# Supplementary material for: Effects of Reablement on the Independence of Community-Dwelling Older Adults with Mild Disability: A Randomized Controlled Trial
Source: MDPI journal article supplement (doi:10.3390/ijerph16203954), 2019-10-17
Supplement: s1 [file s1]

# Assessment sheet for self-management

No /

|      |                   |                             |
|------|-------------------|-----------------------------|
| Name | Care goal setting | Process to achieve the goal |
|      |                   |                             |

| Date         | Service            | Condition | Daily activities to achieve the goal        |                                    |                          |      |                                 |                                  |
|--------------|--------------------|-----------|---------------------------------------------|------------------------------------|--------------------------|------|---------------------------------|----------------------------------|
|              |                    |           | 1                                           | 2                                  | 3                        | 4    | Good point/bad point            | Diary / impression               |
|              |                    |           | Stand up from a chair (physical activities) | Swallowing exercises (oral health) | Water intake (nutrition) | xxxx |                                 |                                  |
| Frequency -> |                    |           | 5 times                                     | 5 times                            | 1000 ml/day              | xxxx |                                 |                                  |
| 1-Apr        | Commuting service  | normal    | 4                                           | 5                                  | 1000                     | xxxx | Generally good                  | I made craftwork.                |
| 2-Apr        | CoMMIT             | good      | 2                                           | 5                                  | 900                      | xxxx | Should improve activity 1       | I learned new self-training.     |
| 3-Apr        |                    | good      | 0                                           | 0                                  | 1200                     | xxxx | Should improve activity 1 and 2 | I watered the flowers.           |
| 4-Apr        |                    | good      | 4                                           | 5                                  | 900                      | xxxx | Generally good                  | I chatted with neighbors.        |
| 5-Apr        | Home-visit service | normal    | 0                                           | 5                                  | 900                      | xxxx | Should improve activity 1       |                                  |
| 6-Apr        |                    | normal    | 0                                           | 5                                  | 900                      | xxxx | Should improve activity 1       | I went to my grandson's house.   |
| 7-Apr        |                    | normal    | 5                                           | 5                                  | 1000                     | xxxx | Should improve activity 1       | I went to shopping on a bicycle. |

|                     |                          |  |                      |
|---------------------|--------------------------|--|----------------------|
| Comment from family | Comment from participant |  | Advise from provider |
|                     |                          |  |                      |
