# Supplementary material for: Effects of Reablement on the Independence of Community-Dwelling Older Adults with Mild Disability: A Randomized Controlled Trial
Source: MDPI journal article supplement (doi:10.3390/ijerph16203954), 2019-10-17
Supplement: s1 [file s1]

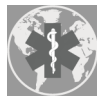

## Supplementary Materials:

**Table S1.** Options and their corresponding codes used in the assessment of IADL and ADL.

| Item                                                           | Options and Their Corresponding Codes                                                                                                                            |
|----------------------------------------------------------------|------------------------------------------------------------------------------------------------------------------------------------------------------------------|
| <b>IADL</b>                                                    |                                                                                                                                                                  |
| Getting around outdoors                                        | 0 = at least once a week; 1 = at least once a month/less than once a month                                                                                       |
| Taking medication                                              | 0 = independent, 1 = need help/dependent                                                                                                                         |
| Managing money                                                 | 0 = independent, 1 = need help/dependent                                                                                                                         |
| Shopping for groceries                                         | 0 = independent, 1 = need supervision/need help/dependent                                                                                                        |
| Preparing food                                                 | 0 = independent, 1 = need supervision/need help/dependent                                                                                                        |
| <b>ADL</b>                                                     |                                                                                                                                                                  |
| Ability to turn over in bed                                    | 0 = independent/need equipment; 1 = dependent                                                                                                                    |
| Sitting up in bed                                              | 0 = independent/need equipment; 1 = dependent                                                                                                                    |
| Sitting for 10 minutes                                         | 0 = independent/need upper limb; 1 = need help/dependent                                                                                                         |
| Standing on both feet for 10 seconds                           | 0 = independent/need equipment; 1 = dependent                                                                                                                    |
| Walking 5 meters                                               | 0 = independent/need equipment; 1 = dependent                                                                                                                    |
| Standing up                                                    | 0 = independent/need equipment; 1 = dependent                                                                                                                    |
| Standing on one foot for 1 second                              | 0 = independent/need equipment; 1 = dependent                                                                                                                    |
| Washing body                                                   | 0 = independent; 1 = need help/dependent/does not do                                                                                                             |
| Caring for nails                                               | 0 = independent; 1 = need help/dependent                                                                                                                         |
| Ability to see                                                 | 0 = no problem; 1 = can read the eye-chart from 1-meter distance/can read the eye-chart in front of one's eyes/with vision problems/unable to assess the ability |
| Ability to hear                                                | 0 = no problem; 1 = mild difficulty/moderate difficulty/severe difficulty/unable to assess the ability                                                           |
| Moving from bed to wheelchair, wheelchair to toilet, and so on | 0 = independent, 1 = need supervision/need help/dependent                                                                                                        |
| Moving from room to room                                       | 0 = independent, 1 = need supervision/need help/dependent                                                                                                        |
| Swallowing                                                     | 0 = independent, 1 = need supervision/difficulty                                                                                                                 |
| Eating                                                         | 0 = independent, 1 = need supervision/need help/dependent                                                                                                        |
| Urinating                                                      | 0 = independent, 1 = need supervision/need help/dependent                                                                                                        |
| Defecating                                                     | 0 = independent, 1 = need supervision/need help/dependent                                                                                                        |
| Oral care                                                      | 0 = independent, 1 = need help/dependent                                                                                                                         |
| Washing face                                                   | 0 = independent, 1 = need help/dependent                                                                                                                         |
| Styling hair                                                   | 0 = independent, 1 = need help/dependent                                                                                                                         |
| Putting on and/or taking off upper wear                        | 0 = independent, 1 = need supervision/need help/dependent                                                                                                        |
| Putting on and/or taking off lower wear                        | 0 = independent, 1 = need supervision/need help/dependent                                                                                                        |

ADL, activities of daily living; IADL, instrumental activities of daily living.

**Table S2.** Use of long-term care services by different population sets during the 5-month intervention period.

| Population                                         | Intervention Group | Control Group |
|----------------------------------------------------|--------------------|---------------|
| ITT population                                     |                    |               |
| Home-visit services, average visits                | 15.6 (20.6)        | 16.3 (32.5)   |
| Commuting services, average visits                 | 26.1 (18.7)        | 19.9 (15.9)   |
| Short-stay services, average days                  | 0.1 (1.1)          | 0.1 (1.1)     |
| Facility services, average days                    | 0.3 (3.8)          | 0.0 (0.0)     |
| Medical care management counseling, average visits | 0.5 (3.6)          | 0.3 (2.7)     |
| Rental of assistive equipment, average days        | 50.6 (69.8)        | 54.6 (70.6)   |
| FAS population                                     |                    |               |
| Home-visit services, average visits                | 16.1 (19.9)        | 17.5 (33.3)   |
| Commuting services, average visits                 | 29.8 (17.8)        | 21.2 (15.6)   |
| Short-stay services, average days                  | 0.1 (1.2)          | 0.1 (1.1)     |
| Facility services, average days                    | 0.0 (0.0)          | 0.0 (0.0)     |
| Medical care management counseling, average visits | 0.3 (3.6)          | 0.3 (2.8)     |
| Rental of assistive equipment, average days        | 53.0 (70.7)        | 58.3 (71.5)   |
| PPS population                                     |                    |               |
| Home-visit services, average visits                | 16.4 (20.3)        | 17.7 (33.7)   |
| Commuting services, average visits                 | 31.1 (17.4)        | 21.5 (15.7)   |
| Short-stay services, average days                  | 0.1 (1.3)          | 0.2 (1.1)     |
| Facility services, average days                    | 0.0 (0.0)          | 0.0 (0.0)     |
| Medical care management counseling, average visits | 0.3 (3.8)          | 0.4 (2.9)     |
| Rental of assistive equipment, average days        | 53.0 (70.8)        | 59.9 (71.9)   |

FAS, full analysis set; ITT, intention-to-treat; PPS, per-protocol set; SD, standard deviation. The values inside parentheses denote the SD values for the two groups in each row. The FAS population refers to participants who have received the allocated interventions at least once, and the PPS population refers to those who have received more than half of the allocated interventions.

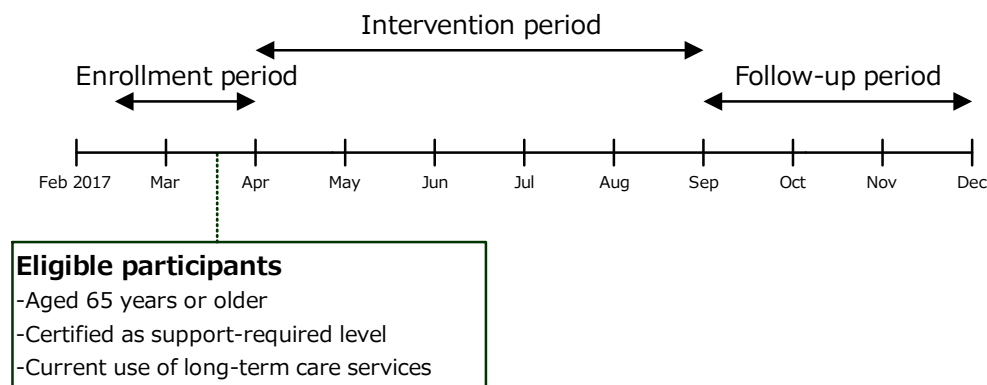

Figure S1. Timeline of the trial.

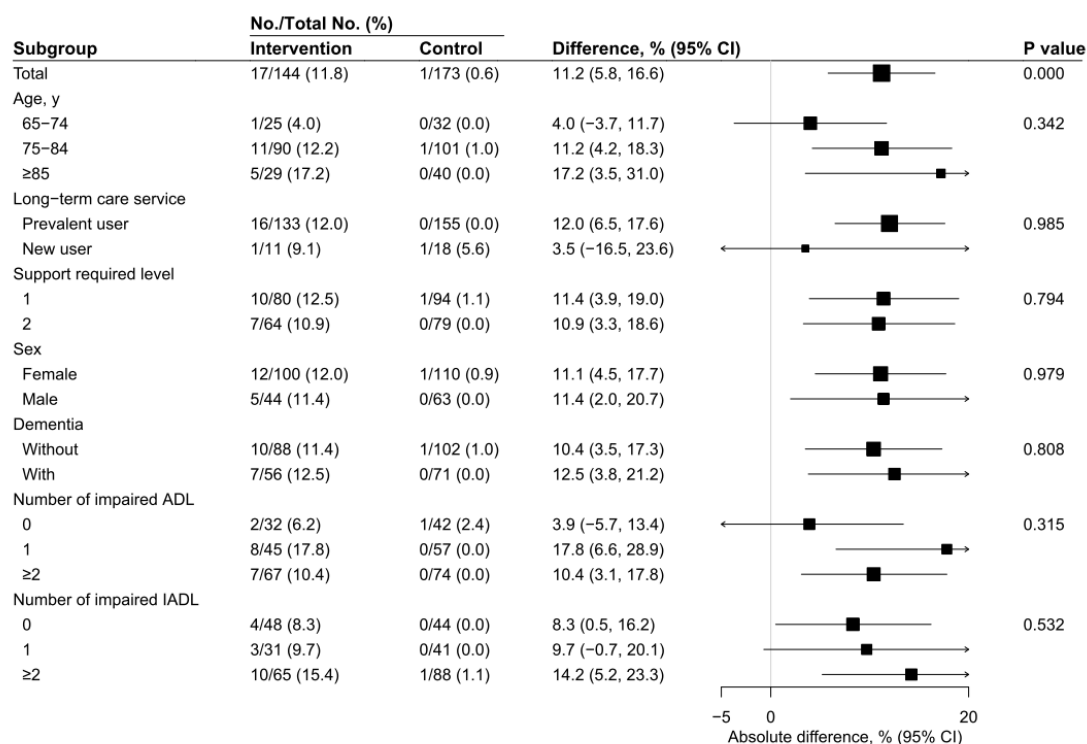

**Figure S2.** Effects of reablement on the independence from long-term care services of post-hoc subgroups in the full set analysis population, which excluded participants who had not received the allocated interventions. The *p*-values for subgroup comparisons correspond to the test for interaction. ADL, activities of daily living; CI, confidence interval; IADL, instrumental activities of daily living; y, years.

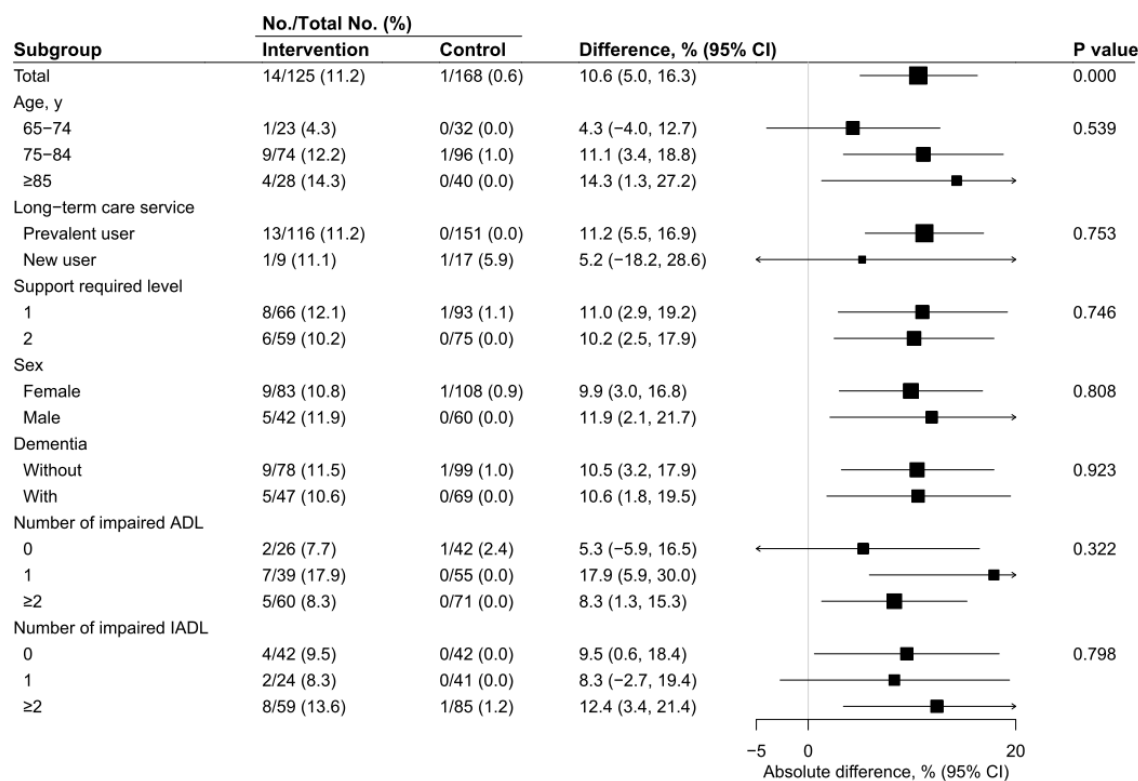

**Figure S3.** Effects of reablement on the independence from long-term care services of post-hoc subgroups in the per-protocol set population, which excluded participants who had not received more than half of the allocated interventions. The *p*-values for subgroup comparisons correspond to the test for interaction. ADL, activities of daily living; CI, confidence interval; IADL, instrumental activities of daily living; y, years.
